# Supplementary material for: Mixing Compost and Biochar Can Enhance the Chemical and Biological Recovery of Soils Contaminated by Potentially Toxic Elements
Source: MDPI journal article supplement (doi:10.3390/plants13020284), 2024-01-18
Supplement: s1 [file s1]

Table S1 Chemical characteristics of the biochar and compost used in this study. Values represent mean  $\pm$  SE (n=3).

u.d.l.: under detection limit (i.e.,  $<0.2 \mu\text{g}\cdot\text{kg}^{-1}$ ).

| Chemical parameters                                                   | Biochar           | Compost          |
|-----------------------------------------------------------------------|-------------------|------------------|
| pH                                                                    | 9.30 $\pm$ 0.01   | 8.60 $\pm$ 0.02  |
| EC (mS $\cdot$ cm <sup>-1</sup> )                                     | 9.91 $\pm$ 2.79   | 4.59 $\pm$ 0.01  |
| Ash (%)                                                               | 2.44 $\pm$ 0.10   | 46.42 $\pm$ 2.84 |
| CEC (cmol <sub>(+)</sub> kg <sup>-1</sup> )                           | 18.81 $\pm$ 0.30  | 77.75 $\pm$ 0.21 |
| Total C (%)                                                           | 61.32 $\pm$ 0.06  | 26.38 $\pm$ 0.39 |
| Total N (%)                                                           | 0.30 $\pm$ 0.02   | 2.80 $\pm$ 0.07  |
| DOC (mg $\cdot$ g <sup>-1</sup> )                                     | 0.020 $\pm$ 0.003 | 0.603 $\pm$ 0.04 |
| P extractable (mg $\cdot$ kg <sup>-1</sup> )                          | 84.52 $\pm$ 3.01  | 58.36 $\pm$ 4.28 |
| <i>Total PTEs concentration (mg<math>\cdot</math>kg<sup>-1</sup>)</i> |                   |                  |
| Total Sb                                                              | u.d.l.            | u.d.l.           |
| Total As                                                              | u.d.l.            | u.d.l.           |
| Total Cd                                                              | u.d.l.            | u.d.l.           |
| Total Fe                                                              | 524.8 $\pm$ 12.7  | 5494 $\pm$ 66    |
| Total Mn                                                              | 358.1 $\pm$ 5.1   | 147.9 $\pm$ 6.2  |
| Total Pb                                                              | u.d.l.            | u.d.l.           |
| Total Cu                                                              | 207.1 $\pm$ 2.9   | u.d.l.           |
| Total Zn                                                              | u.d.l.            | 26.91 $\pm$ 0.89 |
